# Supplementary material for: Role of Flaxseed Gum and Whey Protein Microparticles in Formulating Low-Fat Model Mayonnaises
Source: MDPI journal article supplement (doi:10.3390/foods11030282), 2022-01-21
Supplement: s1 [file s1]

Table S1 Average particle size ( $D_{4,3}$ ) of whey protein microparticles after homogenization at different speeds

| Speed (rpm) | $D_{4,3}$ ( $\mu\text{m}$ ) |                       |
|-------------|-----------------------------|-----------------------|
|             | 10 mM $\text{CaCl}_2$       | 15 mM $\text{CaCl}_2$ |
| 9000        | $40.01 \pm 0.79^a$          | $110.13 \pm 0.05^a$   |
| 12000       | $36.17 \pm 0.61^b$          | $78.64 \pm 0.37^b$    |
| 15000       | $16.28 \pm 0.18^c$          | $57.69 \pm 0.20^c$    |
| 18000       | $15.15 \pm 0.11^d$          | $54.10 \pm 0.32^d$    |
| 21000       | $9.94 \pm 0.21^e$           | $32.39 \pm 0.78^e$    |

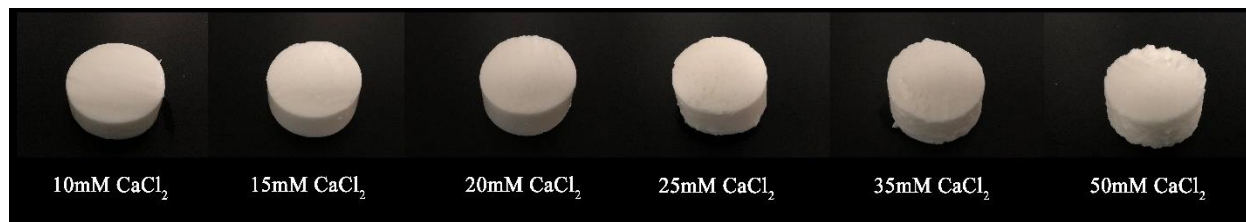

Figure S1 Photographs of the heat-set whey protein gels containing different CaCl<sub>2</sub> concentrations.

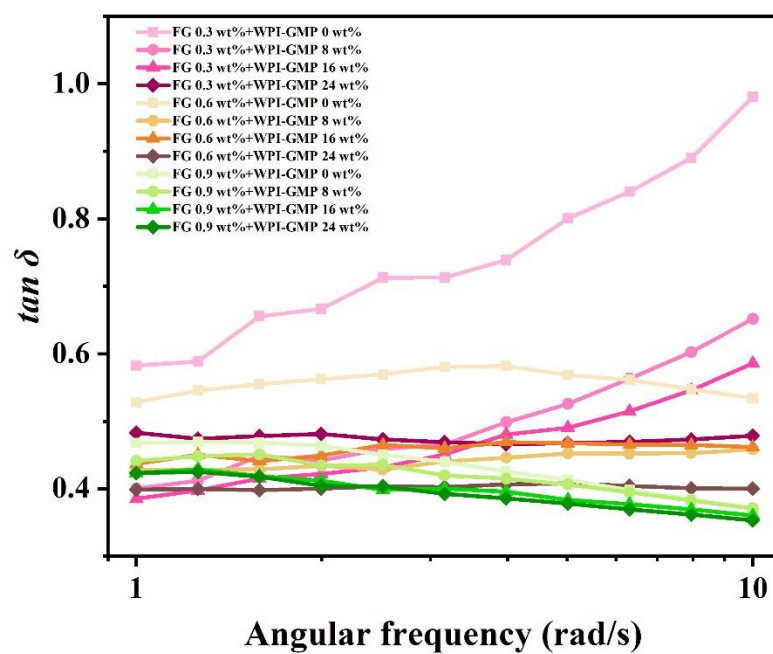

Figure S2 Phase angle of low-fat mayonnaises in the oscillatory shear test with the frequency sweep.
